# Supplementary material
Source: MDPI journal article supplement (doi:10.3390/horticulturae12030352)
Supplement: s1 [file horticulturae-4173615-supplementary.pdf › horticulturae-4173615-supplementary.pdf]

Table S1. Summary of repeated-measures ANOVA for the effects of harvest time and biostimulant treatments and harvest time on chlorophyll content, flavonoids, and nitrogen flavonol index (NFI) of cardoon leaves grown in a floating system.

| Chlorophyll        |    |        |         |                  |
|--------------------|----|--------|---------|------------------|
| Source of variance | df | f      | p       | Partial $\eta^2$ |
| Treatment          | 2  | 18.34  | < 0.001 | 0.13             |
| Time               | 3  | 29.43  | < 0.001 | 0.27             |
| Treatment x Time   | 6  | 4.5    | < 0.001 | 0.10             |
| Flavonoids         |    |        |         |                  |
| Source of variance | df | f      | p       | Partial $\eta^2$ |
| Treatment          | 2  | 0.91   | < 0.001 | 0.60             |
| Time               | 3  | 126.39 | < 0.05  | 0.007            |
| Treatment x Time   | 6  | 0.65   | < 0.05  | 0.015            |
| NFI                |    |        |         |                  |
| Source of variance | df | f      | p       | Partial $\eta^2$ |
| Treatment          | 2  | 13.79  | < 0.001 | 0.47             |
| Time               | 3  | 69.07  | < 0.001 | 0.11             |
| Treatment x Time   | 6  | 4.79   | < 0.001 | 0.11             |

Note: df = degrees of freedom; f = Fisher test statistic; p = significance level; Partial  $\eta^2$  = partial eta squared.

Table S2. Summary of repeated-measures ANOVA for the effects of biostimulant treatments and harvest time on total phenolic content (TPC) and antioxidant activity ( $IC_{50}$ ) of cardoon leaves grown in a floating system.

| TPC (mg GAE g <sup>-1</sup> DE)         |    |        |         |                  |
|-----------------------------------------|----|--------|---------|------------------|
| Source of variance                      | df | f      | p       | Partial $\eta^2$ |
| Treatment                               | 2  | 404.04 | < 0.001 | 0.97             |
| Time                                    | 3  | 978.98 | < 0.001 | 0.99             |
| Treatment x Time                        | 6  | 475.73 | < 0.001 | 0.99             |
| $IC_{50n}$ ( $\mu$ g mL <sup>-1</sup> ) |    |        |         |                  |
| Source of variance                      | df | f      | p       | Partial $\eta^2$ |
| Treatment                               | 2  | 42.00  | < 0.001 | 0.79             |
| Time                                    | 3  | 71.53  | < 0.001 | 0.91             |
| Treatment x Time                        | 6  | 3.12   | < 0.05  | 0.046            |

Note: df = degrees of freedom; f = Fisher test statistic; p = significance level; Partial  $\eta^2$  = partial eta squared.

Table S3. Summary of repeated-measures ANOVA for the effects of biostimulant treatments and harvest time on total Kjeldahl nitrogen (TKN), nitrate ( $\text{NO}_3^-$ ), ammonium ( $\text{NH}_4^+$ ),  $\text{NO}_3^-/\text{NH}_4^+$  ratio, and Norg/TKN in leaves of cardoon plants grown in a floating system.

| Source of variance | TKN ( $\text{g kg}^{-1}$ DW)             |        |         |                  |
|--------------------|------------------------------------------|--------|---------|------------------|
|                    | df                                       | f      | p       | Partial $\eta^2$ |
| Treatment          | 2                                        | 55.75  | < 0.001 | 0.72             |
| Time               | 3                                        | 69.39  | < 0.001 | 0.83             |
| Treatment x Time   | 6                                        | 15.24  | < 0.001 | 0.68             |
|                    | $\text{NO}_3^-$ ( $\text{g kg}^{-1}$ DW) |        |         |                  |
|                    | df                                       | f      | p       | Partial $\eta^2$ |
| Treatment          | 2                                        | 3.32   | < 0.05  | 0.13             |
| Time               | 3                                        | 6.00   | < 0.01  | 0.29             |
| Treatment x Time   | 6                                        | 2.13   | < 0.05  | 0.23             |
|                    | $\text{NH}_4^+$ ( $\text{g kg}^{-1}$ DW) |        |         |                  |
|                    | df                                       | f      | p       | Partial $\eta^2$ |
| Treatment          | 2                                        | 311.32 | < 0.001 | 0.93             |
| Time               | 3                                        | 107.65 | < 0.001 | 0.88             |
| Treatment x Time   | 6                                        | 39.63  | < 0.001 | 0.84             |
|                    | $\text{NO}_3^-/\text{NH}_4^+$            |        |         |                  |
|                    | df                                       | f      | p       | Partial $\eta^2$ |
| Treatment          | 2                                        | 34.19  | < 0.001 | 0.61             |
| Time               | 3                                        | 14.57  | < 0.001 | 0.50             |
| Treatment x Time   | 6                                        | 11.96  | < 0.001 | 0.8462           |
|                    | Norg/TKN (%)                             |        |         |                  |
|                    | df                                       | f      | p       | Partial $\eta^2$ |
| Treatment          | 2                                        | 10.29  | < 0.001 | 0.32             |
| Time               | 3                                        | 28.83  | < 0.001 | 0.66             |
| Treatment x Time   | 6                                        | 5.26   | < 0.001 | 0.42             |

Note: df = degrees of freedom; f = Fisher test statistic; p = significance level; Partial  $\eta^2$  = partial eta squared.

Table S4. Summary of repeated-measures ANOVA for the effects of biostimulant treatments and harvest time on leaf mineral composition (P, K, Ca, Mg, S, Na, and Cl) of cardoon plants grown in a floating system.

| P (g kg <sup>-1</sup> DW)   |    |       |         |                  |
|-----------------------------|----|-------|---------|------------------|
| Source of variance          | df | f     | p       | Partial $\eta^2$ |
| Treatment                   | 2  | 42.31 | < 0.001 | 0.79             |
| Time                        | 3  | 58.74 | < 0.001 | 0.85             |
| Treatment x Time            | 6  | 9.62  | < 0.001 | 0.55             |
| K (g kg <sup>-1</sup> DW)   |    |       |         |                  |
|                             | df | f     | p       | Partial $\eta^2$ |
| Treatment                   | 2  | 66.48 | < 0.001 | 0.83             |
| Time                        | 3  | 92.17 | < 0.001 | 0.90             |
| Treatment x Time            | 6  | 14.29 | < 0.001 | 0.68             |
| Ca (g kg <sup>-1</sup> DW)  |    |       |         |                  |
|                             | df | f     | p       | Partial $\eta^2$ |
| Treatment                   | 2  | 37.95 | < 0.001 | 0.75             |
| Time                        | 3  | 44.68 | < 0.001 | 0.78             |
| Treatment x Time            | 6  | 7.81  | < 0.001 | 0.48             |
| Mg (mg kg <sup>-1</sup> DW) |    |       |         |                  |
|                             | df | f     | p       | Partial $\eta^2$ |
| Treatment                   | 2  | 21.64 | < 0.001 | 0.63             |
| Time                        | 3  | 34.52 | < 0.001 | 0.72             |
| Treatment x Time            | 6  | 5.97  | < 0.001 | 0.41             |
| S (g kg <sup>-1</sup> DW)   |    |       |         |                  |
|                             | df | f     | p       | Partial $\eta^2$ |
| Treatment                   | 2  | 18.73 | < 0.001 | 0.59             |
| Time                        | 3  | 27.88 | < 0.001 | 0.70             |
| Treatment x Time            | 6  | 4.66  | < 0.001 | 0.35             |
| Na (g kg <sup>-1</sup> DW)  |    |       |         |                  |
|                             | df | f     | p       | Partial $\eta^2$ |
| Treatment                   | 2  | 4.92  | < 0.05  | 0.29             |
| Time                        | 3  | 6.41  | < 0.01  | 0.36             |
| Treatment x Time            | 6  | 1.88  | < 0.05  | 0.18             |
| Cl (g kg <sup>-1</sup> DW)  |    |       |         |                  |
|                             | df | f     | p       | Partial $\eta^2$ |
| Treatment                   | 2  | 12.56 | < 0.001 | 0.49             |
| Time                        | 3  | 19.84 | < 0.001 | 0.62             |
| Treatment x Time            | 6  | 6.73  | < 0.001 | 0.45             |

Note: df = degrees of freedom; f = Fisher test statistic; p = significance level; Partial  $\eta^2$  = partial eta squared.

Table S5. Summary of repeated-measures ANOVA for the effects of biostimulant treatments and harvest time on organic acid composition (malate, oxalate, and citrate) in leaves of cardoon plants grown in a floating system.

| <b>Malate (g kg<sup>-1</sup> DW)</b>  |    |        |         |                  |
|---------------------------------------|----|--------|---------|------------------|
| Source of variance                    | df | f      | p       | Partial $\eta^2$ |
| Treatment                             | 2  | 295.15 | < 0.001 | 0.96             |
| Time                                  | 3  | 390.11 | < 0.001 | 0.98             |
| Treatment x Time                      | 6  | 134.32 | < 0.001 | 0.97             |
| <b>Oxalate (g kg<sup>-1</sup> DW)</b> |    |        |         |                  |
|                                       | df | f      | p       | Partial $\eta^2$ |
| Treatment                             | 2  | 22.71  | < 0.001 | 0.58             |
| Time                                  | 3  | 15.75  | < 0.001 | 0.59             |
| Treatment x Time                      | 6  | 24.30  | < 0.001 | 0.82             |
| <b>Citrate (g kg<sup>-1</sup> DW)</b> |    |        |         |                  |
|                                       | df | f      | p       | Partial $\eta^2$ |
| Treatment                             | 2  | 527.32 | < 0.001 | 0.97             |
| Time                                  | 3  | 958.29 | < 0.001 | 0.99             |
| Treatment x Time                      | 6  | 208.48 | < 0.001 | 0.99             |

*Note:* df = degrees of freedom; f = Fisher test statistic; p = significance level; Partial  $\eta^2$  = partial eta squared.
